# Supplementary material for: A low-cost, ultraflexible cloth-based microfluidic device for wireless electrochemiluminescence application
Source: Royal Society of Chemistry journal article supplement (doi:10.1039/c6lc00289g), 2016-01-01
Supplement: c6lc00289g1.pdf [file c6lc00289g1.pdf]

Electronic supplementary information (ESI) for

# **Low-cost, ultraflexible cloth-based microfluidic device for wireless electrochemiluminescence application**

Min Liu, Rui Liu, Dan Wang, Cuiling Liu, Chunsun Zhang\*

MOE Key Laboratory of Laser Life Science & Institute of Laser Life Science, College of  
Biophotonics, South China Normal University, Guangzhou 510631, China

**\* The contact information of the corresponding authors is:**

Chunsun Zhang, PhD, Professor

MOE Key Laboratory of Laser Life Science & Institute of Laser Life Science,

College of Biophotonics, South China Normal University,

No.55, Zhongshan Avenue West, Tianhe District,

Guangzhou, 510631,

P.R. China

Tel: +86-20-85217070-8501, Fax: +86-20-85216052

E-mail: zhangcs@scnu.edu.cn; zhangcs\_scnu@126.com

**Table S1. Materials cost estimation for a single C-WL-ECL  $\mu$ CAD**

| <b>Material</b>                          | <b>Quantity used per device</b> | <b>Cost per device (\$)</b> |
|------------------------------------------|---------------------------------|-----------------------------|
| Cotton cloth (\$2.7/m <sup>2</sup> )     | 10.5 cm <sup>2</sup>            | 0.00284                     |
| Solid wax (\$0.02/g )                    | 0.045 g                         | 0.0009                      |
| Conductive carbon ink (\$0.095/g)        | 0.1 g                           | 0.0095                      |
| Conductive double-sided tape (\$0.046/m) | 3 cm                            | 0.00137                     |
| Total                                    |                                 | 0.0146                      |

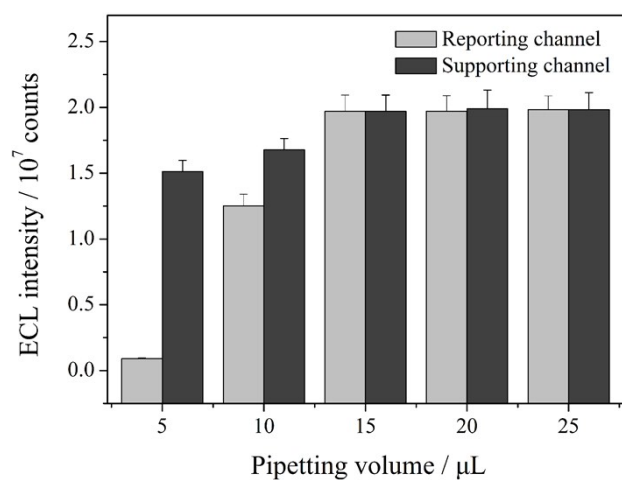

**Figure S1.** Effect of the pipetting volume on the C-WL-ECL intensity using  $\text{Ru}(\text{bpy})_3^{2+}/\text{TPA}$  system. Here,  $L_{\text{BPE}} = 15$  mm,  $W_{\text{BPE}} = 2$  mm,  $\theta = 0^\circ$ ,  $E_{\text{tot}} = 6.5$  V,  $[\text{Ru}(\text{bpy})_3^{2+}] = 5$  mM,  $[\text{TPA}] = 25$  mM,  $[\text{PBS}] = 0.1$  M (pH 7.4), and  $L_{\text{ce}} = L_{\text{ae}} = 5$  mm. The error bars represent the standard deviations from eight independent experiments.

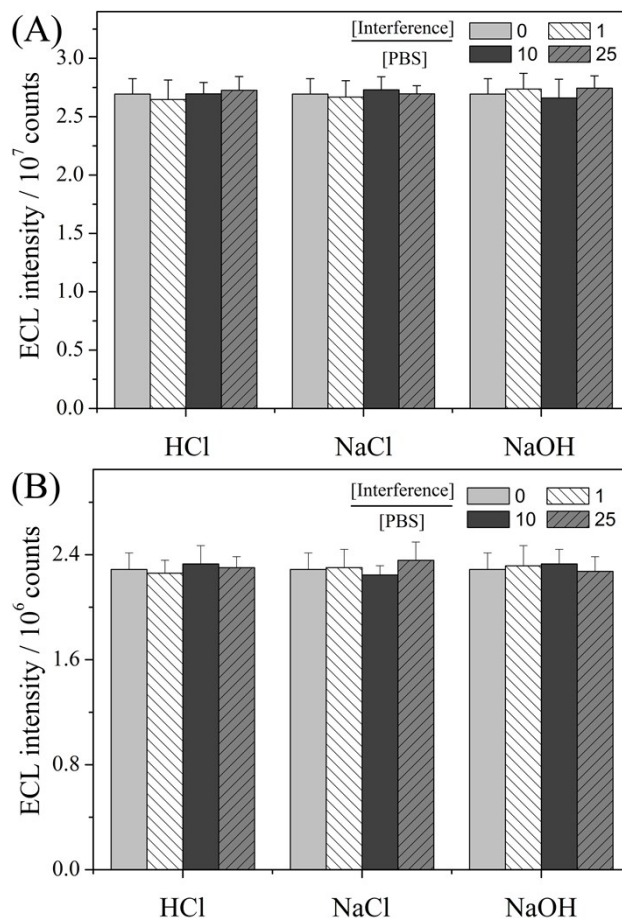

**Figure S2.** Effect of different concentrations of HCl, NaCl or NaOH in the supporting channel of the device on the cloth-based C-WL-ECL intensities using Ru(bpy)<sub>3</sub><sup>2+</sup>/TPA (A) or luminol/H<sub>2</sub>O<sub>2</sub> (B) system. For panels (A) and (B), the solution in the reporting channel was maintained constant, while the buffer solution in the supporting channel was changed, with different ratios between the concentrations of HCl, NaCl or NaOH and PBS ([Interference]/[PBS]: 0, 1, 10 and 25). In panel (A),  $L_{\text{BPE}} = 13$  mm,  $W_{\text{BPE}} = 3$  mm,  $\theta = 0^\circ$ ,  $E_{\text{tot}} = 6.5$  V,  $[\text{Ru}(\text{bpy})_3^{2+}] = 5$  mM,  $[\text{TPA}] = 25$  mM, and  $[\text{PBS}] = 0.1$  M. In panel (B),  $L_{\text{BPE}} = 15$  mm,  $W_{\text{BPE}} = 3$  mm,  $\theta = 180^\circ$ ,  $E_{\text{tot}} = 5$  V,  $[\text{luminol}] = 5$  mM,  $[\text{H}_2\text{O}_2] = 2$  Mm, and  $[\text{PBS}] = 0.1$  M. The error bars represent the standard deviations from eight independent experiments.

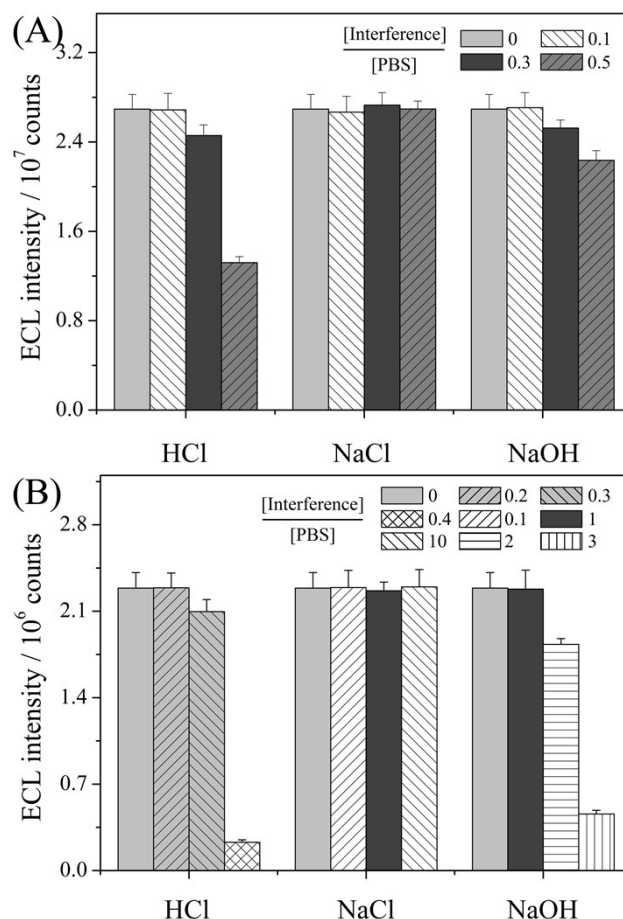

**Figure S3.** Effect of different concentrations of HCl, NaCl or NaOH in the reporting channel of the device on the cloth-based C-WL-ECL intensities using  $\text{Ru(bpy)}_3^{2+}/\text{TPA}$  (A) or luminol/ $\text{H}_2\text{O}_2$  (B) system. For panels (A) and (B), the buffer solution in the supporting channel was maintained constant, while the solution in the reporting channel was changed, with different ratios between the concentrations of HCl, NaCl or NaOH and PBS (for the  $\text{Ru(bpy)}_3^{2+}/\text{TPA}$  system,  $[\text{Interference}]/[\text{PBS}]$ : 0, 0.1, 0.3 and 0.5, while for the luminol/ $\text{H}_2\text{O}_2$  system,  $[\text{Interference}]/[\text{PBS}]$ : 0, 0.2, 0.3 and 0.4 (for HCl); 0, 0.1, 1 and 10 (for NaCl); 0, 1, 2 and 3 (for NaOH)). In panel (A),  $L_{\text{BPE}} = 13$  mm,  $W_{\text{BPE}} = 3$  mm,  $\theta = 0^\circ$ ,  $E_{\text{tot}} = 6.5$  V,  $[\text{Ru(bpy)}_3^{2+}] = 5$  mM,  $[\text{TPA}] = 25$  mM, and  $[\text{PBS}] = 0.1$  M. In panel (B),  $L_{\text{BPE}} = 15$  mm,  $W_{\text{BPE}} = 3$  mm,  $\theta = 180^\circ$ ,  $E_{\text{tot}} = 5$  V,  $[\text{luminol}] = 5$  mM,  $[\text{H}_2\text{O}_2] = 2$  mM, and  $[\text{PBS}] = 0.1$  M. The error bars represent the standard deviations from eight independent experiments.
